# Supplementary material for: Blue shifted hydrogen bond in 3-methylindole·CHX3 complexes (X = Cl, F)
Source: Royal Society of Chemistry journal article supplement (doi:10.1039/b924288k), 2010-01-01
Supplement: b924288k.pdf [file b924288k.pdf]

Table I: Occupancy level, atomic orbital/hybrid coefficients for the C<sub>11</sub>F<sub>12</sub> antibondng orbital

| <b>C11-F12 antibonding orbital in monomer</b>     |              |                |                                         |
|---------------------------------------------------|--------------|----------------|-----------------------------------------|
| Occupancy                                         | Bond orbital | Coefficients   | Hybrids                                 |
| 0.0801                                            | BD* C11- F12 | 0.8494* C 11   | s (22.89%) p 3.35(76.64%) d 0.02(0.47%) |
|                                                   |              | -0.5278* F 12  | s (25.19%) p 2.97(74.74%) d 0.00(0.07%) |
| <b>C11-F12 antibonding orbital in the complex</b> |              |                |                                         |
| 0.0563                                            | BD* C11- F12 | 0.8561* C 11   | s (22.87%) p 3.34(76.30%) d 0.04(0.83%) |
|                                                   |              | -0.5168 * F 12 | s (26.75%) p 2.73(73.16%) d 0.00(0.08%) |

**Figure 1:**

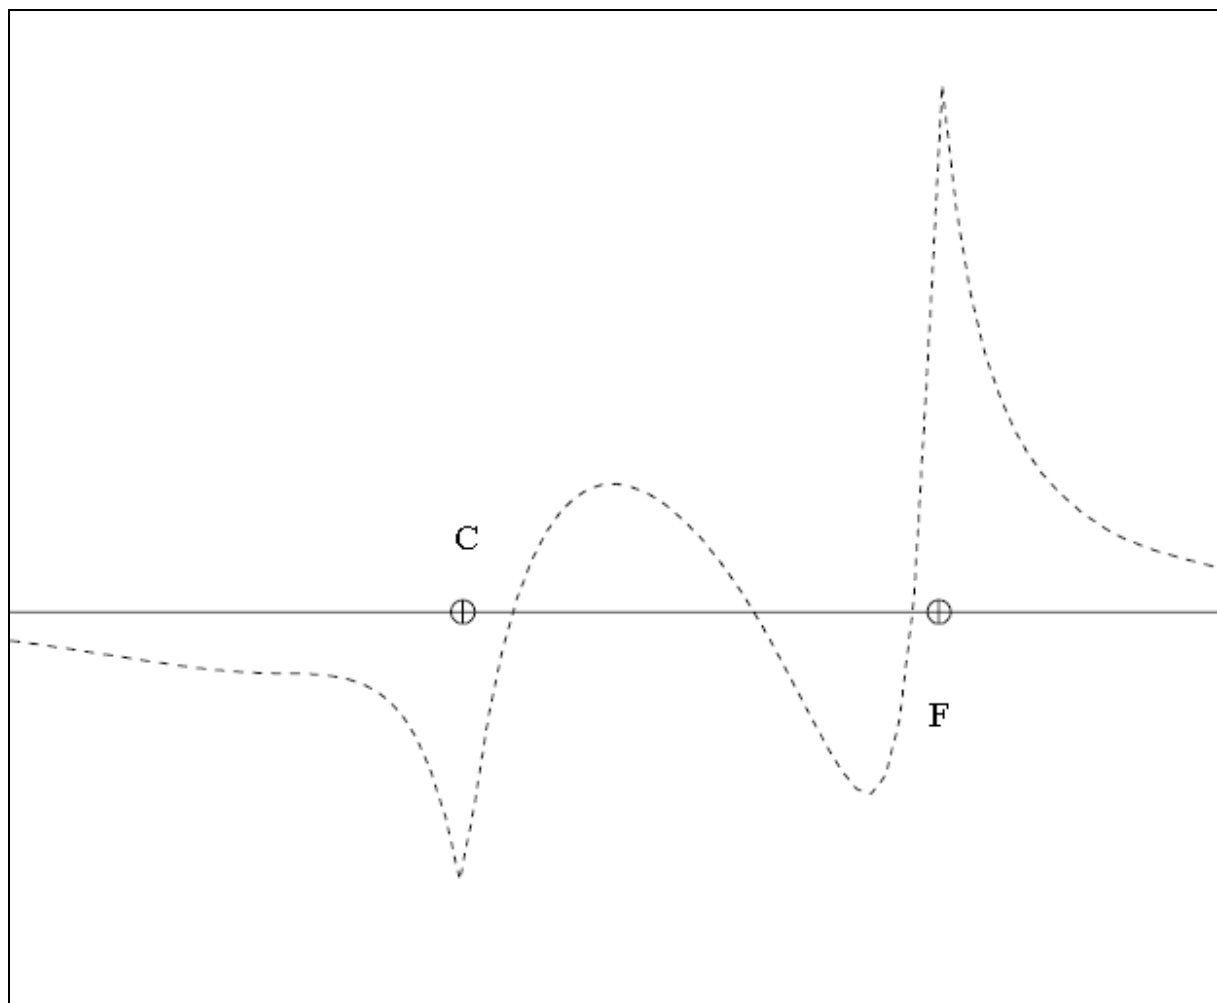

**Figure 1:** 1-D profile plot of the  $\sigma^*(C_{11}F_{12})$  orbital along the C-F bond shown in Figure 7c.

The change in the sign of the wavefunction and the corresponding nodes are clearly visible showing it that it is an antibonding orbital.

**Figure 2:**

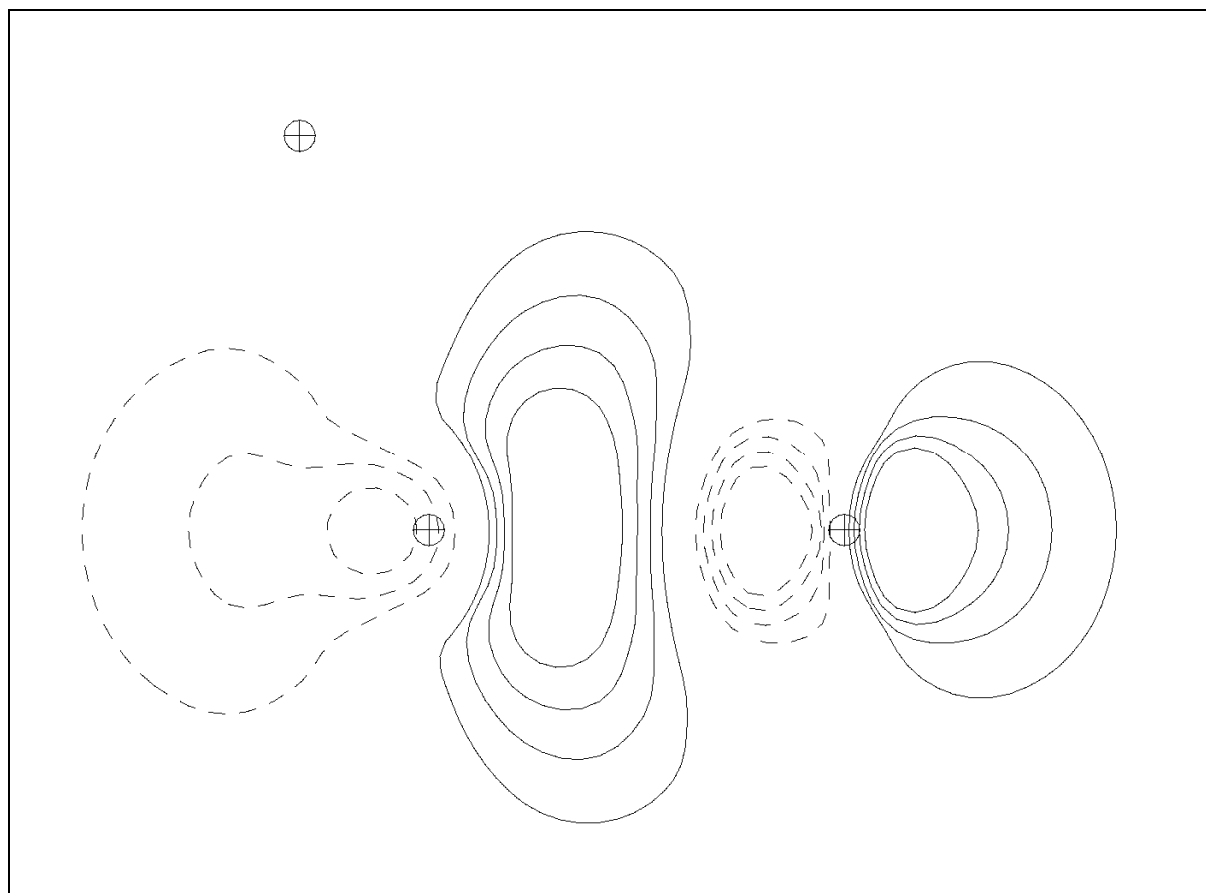

**Figure 2:** 2-D contour plot of the  $\sigma^*(C_{11}F_{12})$  orbital shown in Figure 7c. Here also the change in sign of the function and the corresponding nodes characteristic of an antibonding orbital are seen clearly.
